# Supplementary material
Source: PubMed Central journal article supplement (PMC7212861)
Supplement: vdaa020_suppl_supplementary_material.pdf [file vdaa020_suppl_supplementary_material.pdf]

**Supplemental Table 1:** Identification of a diverse panel of GBM BTICs representative of the different mutational statuses of GBM patients.

| <b>BTIC Line</b> | <b>Diagnosis</b> | <b>Age</b> | <b>Sex</b> | <b>MGMT status</b> | <b>EGFR status</b> | <b>P53 status</b> | <b>PTEN status</b> | <b>IDH1 status</b> | <b>NF1 status</b> | <b>CDKN2A status</b> |
|------------------|------------------|------------|------------|--------------------|--------------------|-------------------|--------------------|--------------------|-------------------|----------------------|
| <b>BT12</b>      | GBM-r            | 59         | M          | U                  | wt                 | wt                | mut                | wt                 | N/A               | N/A                  |
| <b>BT48</b>      | GBM              | 68         | M          | M                  | mut                | wt                | mut                | wt                 | wt                | homo del             |
| <b>BT50</b>      | GBM              | 61         | M          | M                  | wt                 | wt                | mut                | wt                 | wt                | homo del             |
| <b>BT53</b>      | GBM              | 59         | M          | M                  | mut                | mut               | wt                 | wt                 | wt                | homo del             |
| <b>BT67</b>      | GBM              | 44         | M          | M                  | wt                 | wt                | mut                | wt                 | mut/het del       | homo del             |
| <b>BT68</b>      | GBM              | 59         | M          | U                  | vIII               | wt                | wt                 | wt                 | N/A               | N/A                  |
| <b>BT69</b>      | GBM              | 50         | M          | U/M                | het                | mut               | mut                | wt                 | N/A               | homo del             |
| <b>BT73</b>      | GBM              | 52         | M          | M                  | vIII               | mut               | mut                | wt                 | N/A               | homo del             |
| <b>BT124</b>     | GBM              | N/A        | N/A        | U                  | wt                 | mut               | mut                | wt                 | N/A               | N/A                  |
| <b>BT143</b>     | GBM-r            | 46         | F          | M                  | wt                 | mut               | mut                | wt                 | mut               | homo del             |
| <b>BT147</b>     | GBM-r            | 56         | M          | U                  | vIII               | mut               | mut                | wt                 | wt                | homo del             |
| <b>BT189</b>     | GBM              | 55         | F          | U                  | wt                 | mut               | mut                | wt                 | wt                | wt                   |

Common GBM molecular alterations including *MGMT* promoter methylation, *EGFR*, *PTEN*, *TP53*, *NF1*, *IDH1*, and *CDKN2A* mutation statuses for the 11 BTIC lines used in this study. Mut indicates mutant and wt indicates wild-type. U indicates unmethylated and M indicated methylated. U/M indicates hemimethylation. vIII indicates *EGFR* variant III, an activating deletion characteristic of GBM, het del indicates a heterozygous deletion, homo del indicates a homozygous deletion, N/A indicates not available.

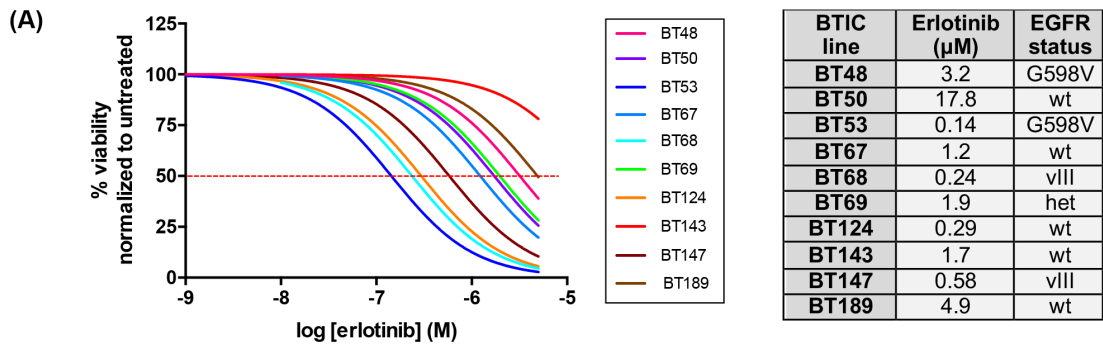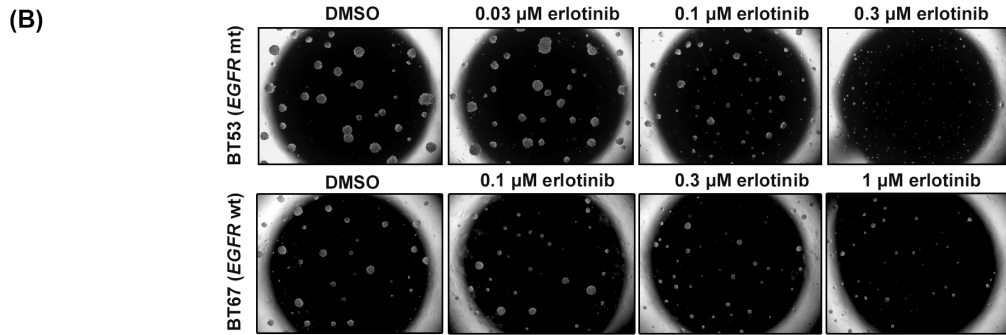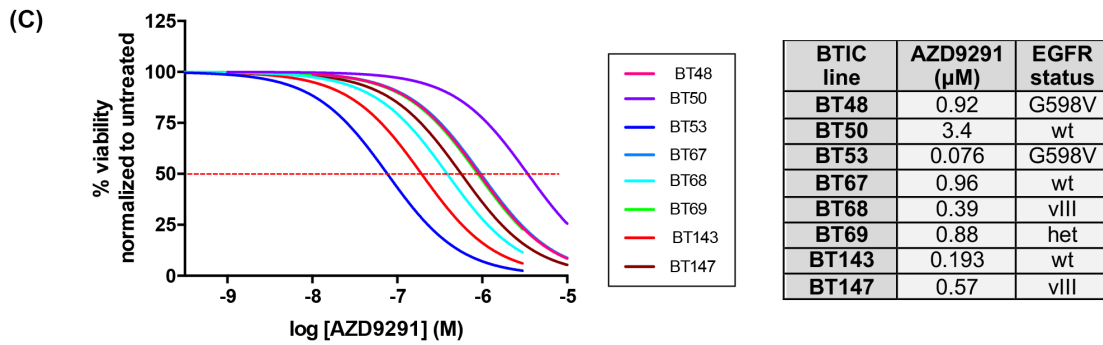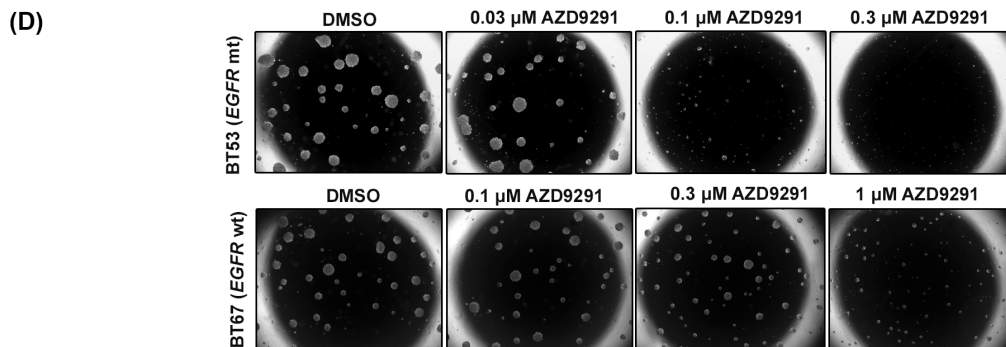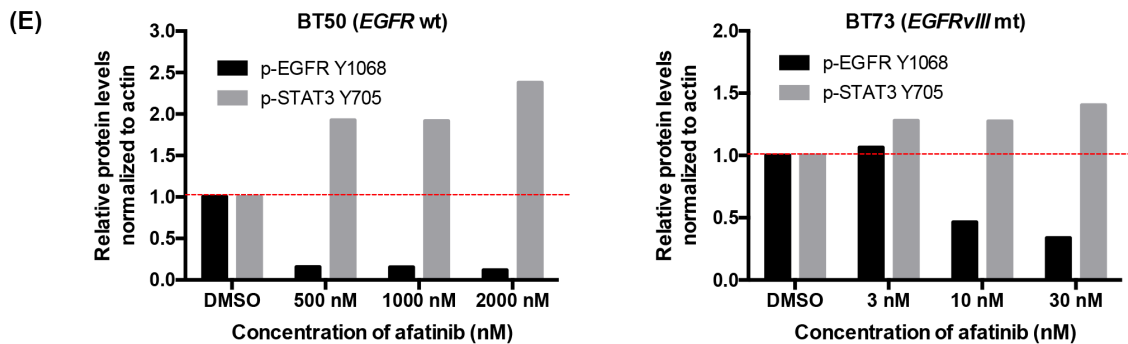

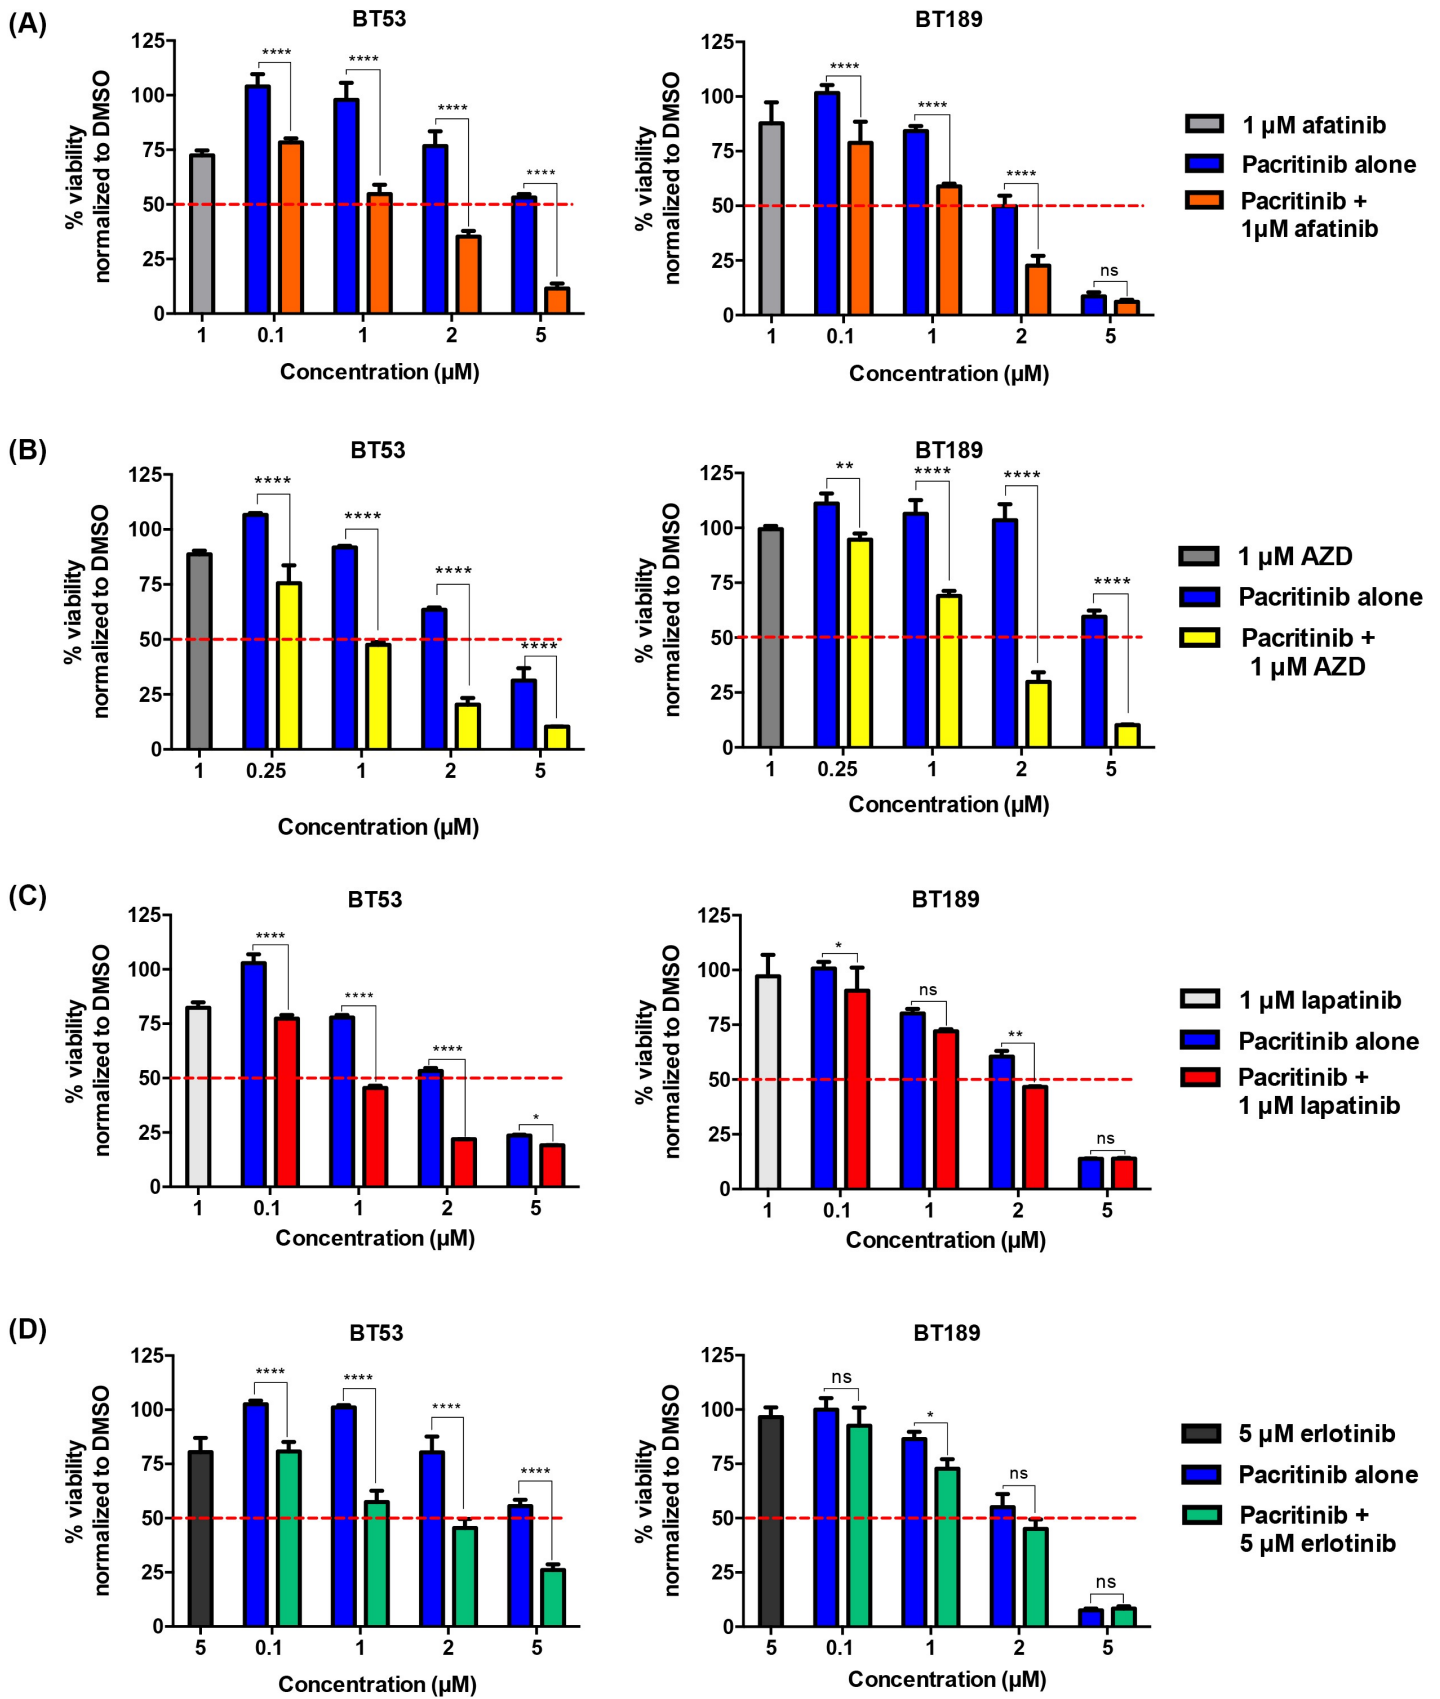

Supplemental Fig. 2

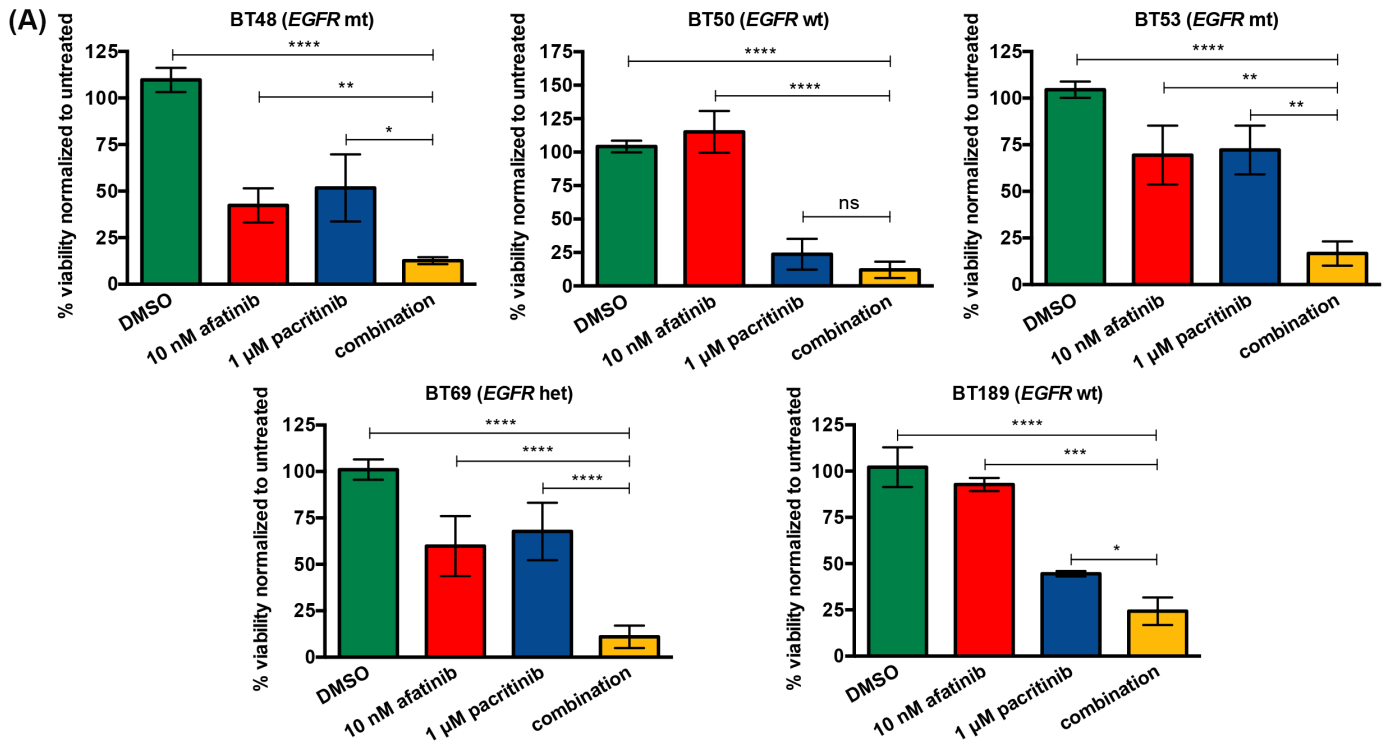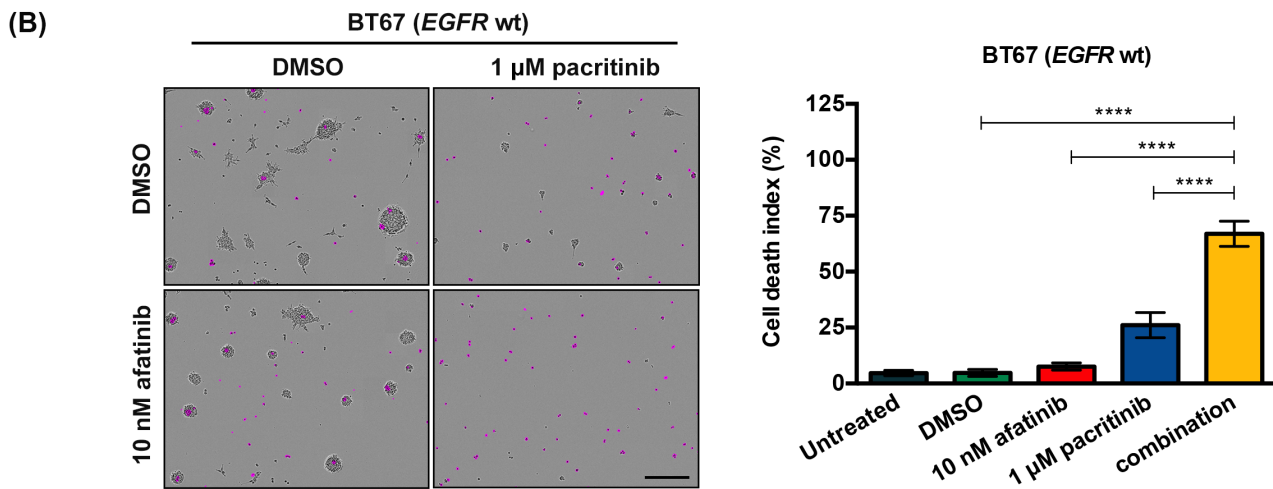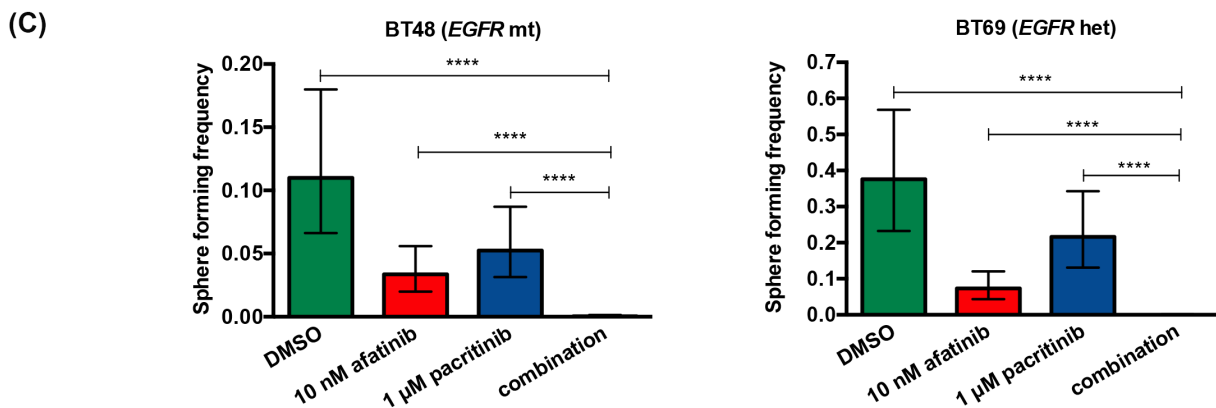

Supplemental Fig. 3

**(A)**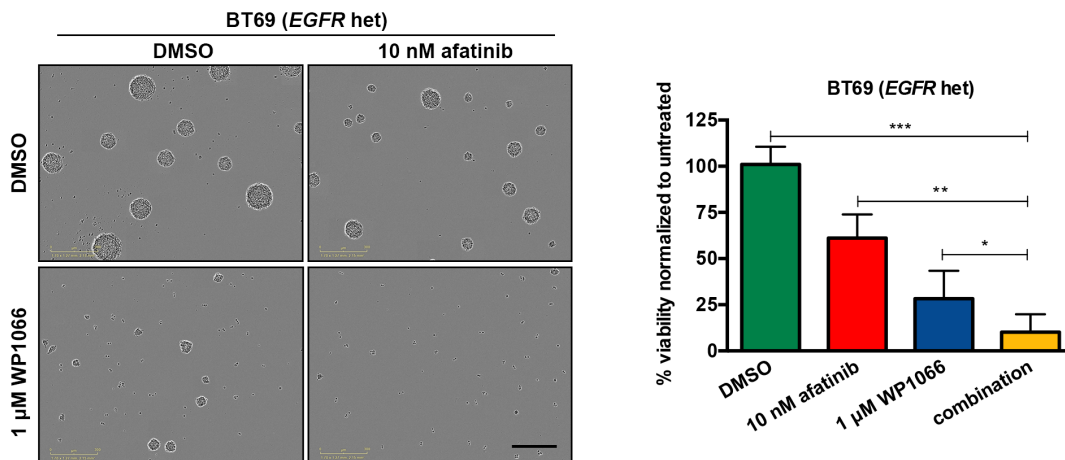**(B)**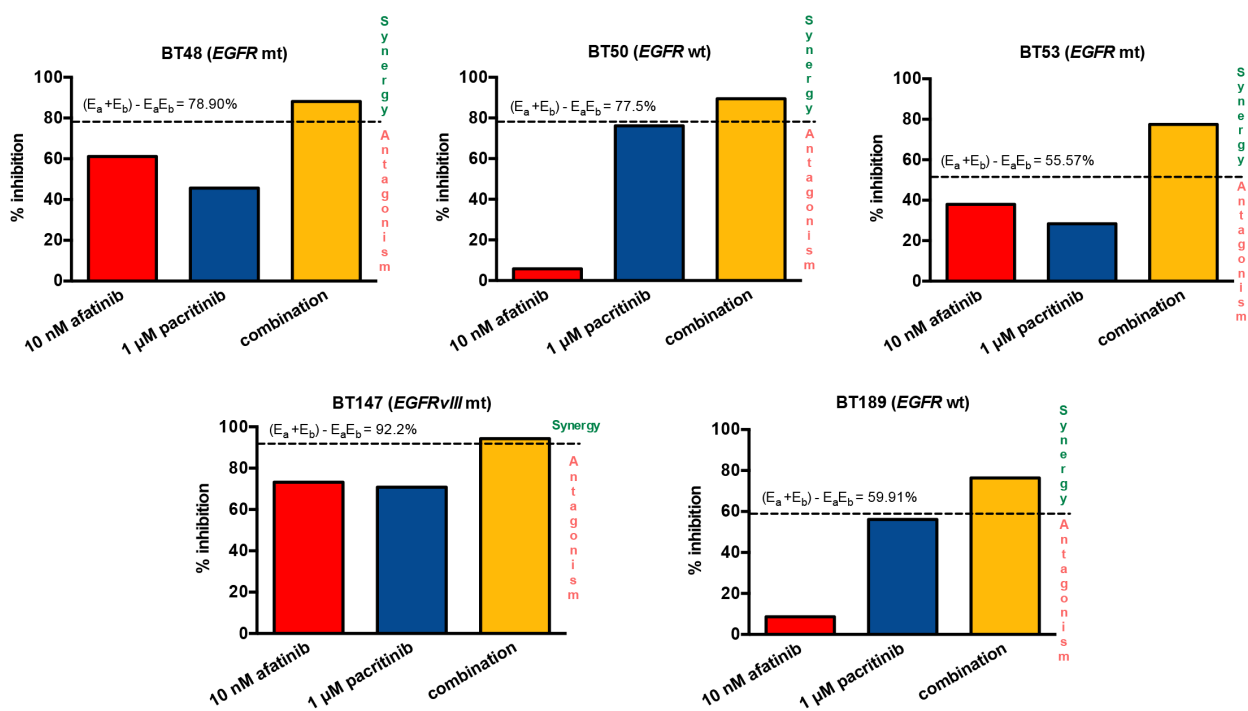**(C)**

|                                   |            | <b>BT69 (EGFR het)</b><br>erlotinib (μM) |            |            |            |            | <b>BT147 (EGFRvIII mt)</b><br>erlotinib (μM) |            |            |            |            |
|-----------------------------------|------------|------------------------------------------|------------|------------|------------|------------|----------------------------------------------|------------|------------|------------|------------|
|                                   |            | 10                                       | 5          | 3          | 1          | 0          | 10                                           | 5          | 3          | 1          | 0          |
| % inhibition pacritinib (μM)      | 1          | 85.0022841                               | 80.3849223 | 78.2738674 | 70.8339955 | -5.1306994 | 87.0287556                                   | 85.5860001 | 84.8352194 | 84.9468128 | 38.5645045 |
|                                   | 0.3        | 77.5243282                               | 65.4335772 | 59.6033463 | 51.4351889 | -14.877944 | 76.7758572                                   | 74.9831207 | 70.8651323 | 67.2372072 | -11.39176  |
|                                   | 0.1        | 76.5056222                               | 59.7428594 | 54.6965544 | 42.1872791 | -8.7372337 | 76.7923093                                   | 71.3976478 | 67.3668418 | 61.2299209 | -5.7182979 |
|                                   | 0          | 68.7835636                               | 58.7946963 | 50.6916304 | 38.5794293 | 0          | 76.0670927                                   | 75.2702882 | 66.7276967 | 64.7736307 | 0          |
| Excess over bliss pacritinib (μM) |            | erlotinib (μM)                           |            |            |            |            | erlotinib (μM)                               |            |            |            |            |
|                                   |            | 10                                       | 5          | 3          | 1          | 0          | 10                                           | 5          | 3          | 1          | 0          |
|                                   | 1          | 17.820342                                | 23.7043463 | 30.1121012 | 35.4058712 | 0          | 1.73205579                                   | 0.77882109 | 5.27622379 | 6.58830734 | 0          |
|                                   | 0.3        | 13.3851286                               | 12.7693831 | 16.2477875 | 21.9938779 | 0          | 3.43514385                                   | 2.52998203 | 7.92773668 | 6.4764801  | 0          |
| 0.1                               | 10.4495115 | 4.54836681                               | 8.3131114  | 8.9743086  | 0          | 2.09377154 | -2.4585218                                   | 2.54175454 | -1.529361  | 0          |            |
| 0                                 | 0          | 0                                        | 0          | 0          | 0          | 0          | 0                                            | 0          | 0          | 0          |            |

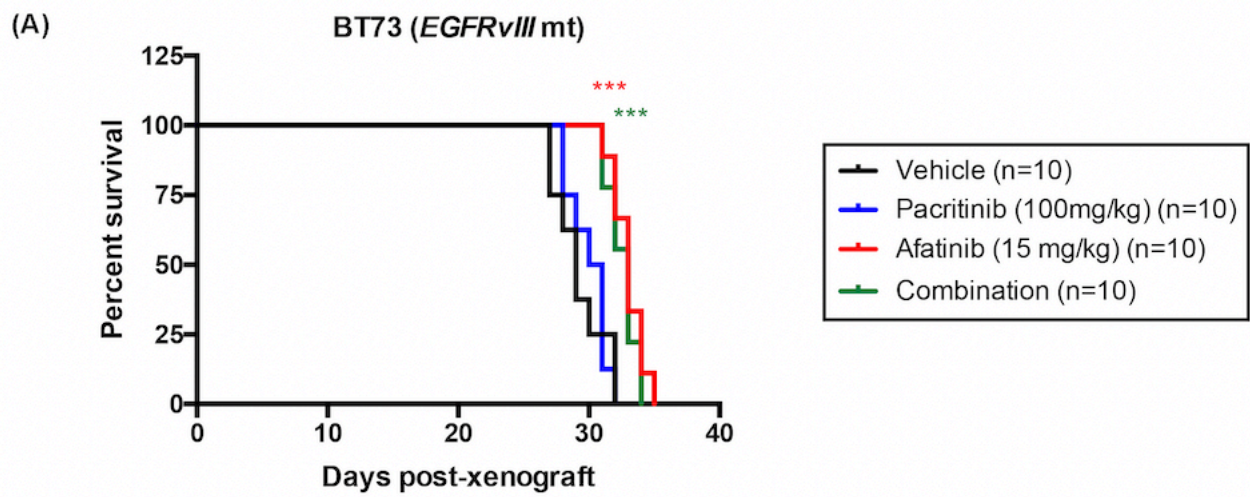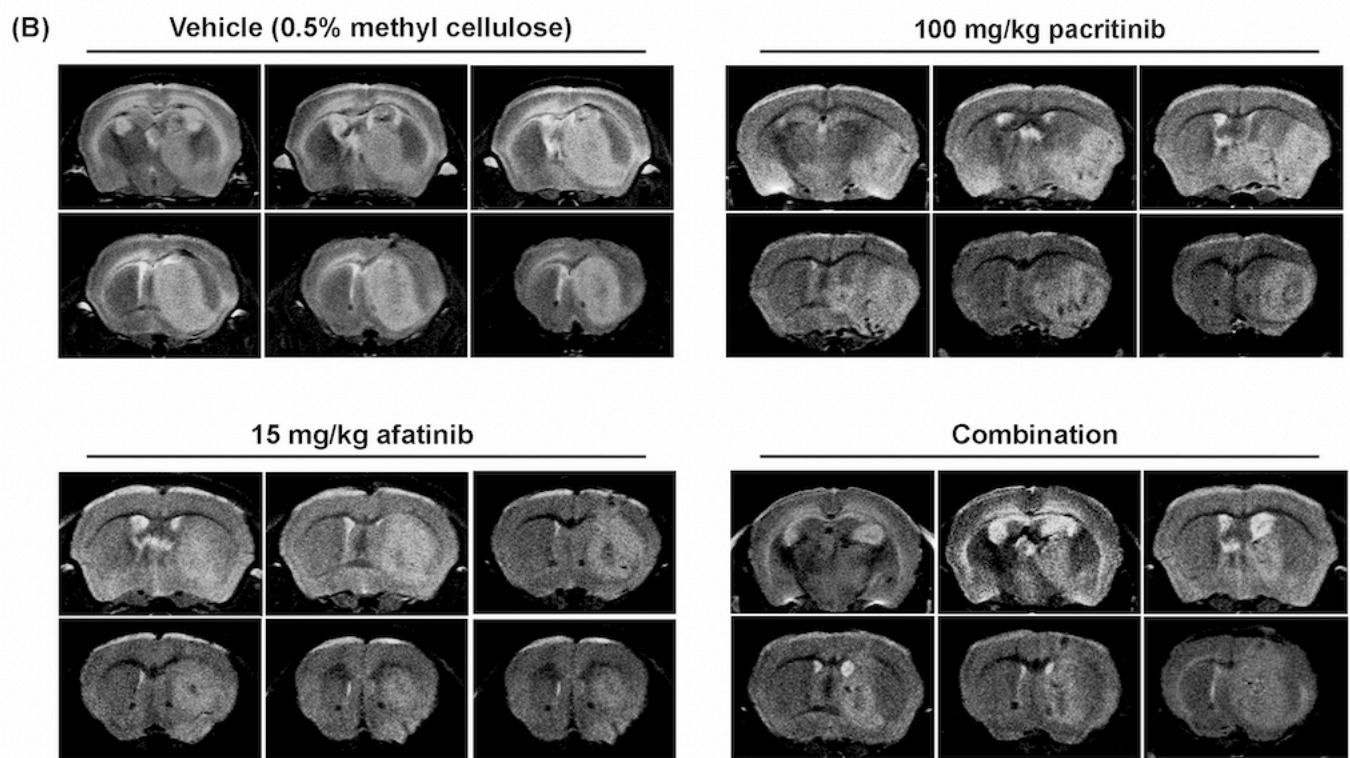

Supplemental Fig. 5
